# Supplementary material
Source: PubMed Central journal article supplement (PMC5078545)

**Fig. S1.** eBURST analysis (<http://eburst.mlst.net/v3/>) of GBS from invasive infections, Japan, April 2010 to March 2013.

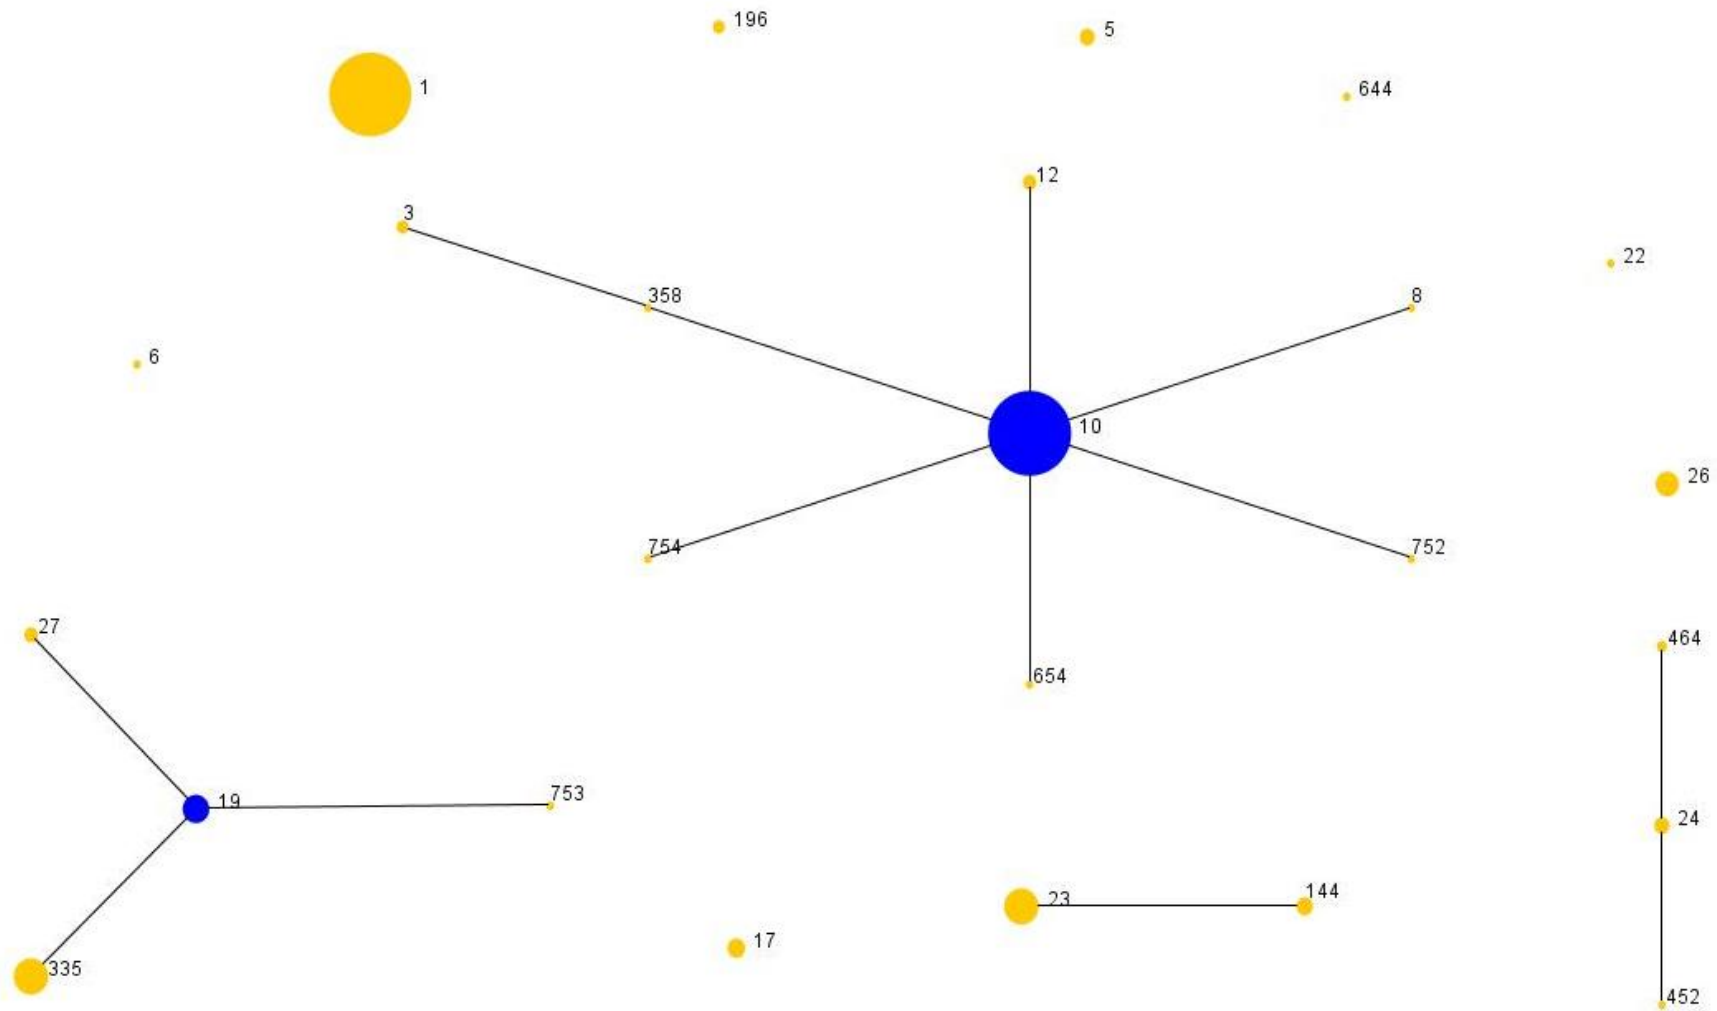

Supplement: JCM.01183-16_zjm999095197so1.pdf [file JCM.01183-16_zjm999095197so1.pdf]
